# Supplementary material
Source: PubMed Central journal article supplement (PMC2568932)
Supplement: M803709200_1.pdf [file M803709200_1.pdf]

**Supplementary Table 1.** Non-bonded interactions (hydrogen bonds and salt bridges) involved in the stabilization of the dimer interface as observed in the FomA-MgAMPPNP-fosfomycin complex. The second part of the dimer (amino acid residues marked with the asterisk) is generated by the symmetry operation y,x,-z.

| Non-bonded interactions  |                           | Distance (Å) |
|--------------------------|---------------------------|--------------|
| Arg <sup>91</sup> (NH1)  | Glu <sup>77*</sup> (OE2)  | 2.93         |
| Arg <sup>91</sup> (NH2)  | Glu <sup>77*</sup> (OE1)  | 2.78         |
| Gln <sup>101</sup> (N)   | Gln <sup>101*</sup> (OE1) | 2.81         |
| Gln <sup>101</sup> (NE2) | Pro <sup>99*</sup> (O)    | 2.96         |
| Arg <sup>116</sup> (NH1) | Glu <sup>118*</sup> (OE1) | 2.83         |
| Arg <sup>116</sup> (NH2) | Asp <sup>122*</sup> (OD2) | 2.24         |
| Ser <sup>117</sup> (OG)  | Ala <sup>104*</sup> (O)   | 2.73         |
| Ser <sup>117</sup> (OG)  | Arg <sup>116*</sup> (O)   | 3.70         |
| Glu <sup>118</sup> (N)   | Arg <sup>116*</sup> (O)   | 3.09         |
| Glu <sup>77</sup> (OE2)  | Arg <sup>91*</sup> (NH1)  | 2.93         |
| Glu <sup>77</sup> (OE1)  | Arg <sup>91*</sup> (NH2)  | 2.78         |
| Gln <sup>101</sup> (OE1) | Gln <sup>101*</sup> (N)   | 2.81         |
| Pro <sup>99</sup> (O)    | Gln <sup>101*</sup> (NE2) | 2.96         |
| Glu <sup>118</sup> (OE1) | Arg <sup>116*</sup> (NH1) | 2.83         |
| Asp <sup>122</sup> (OD2) | Arg <sup>116*</sup> (NH2) | 2.24         |
| Ala <sup>104</sup> (O)   | Ser <sup>117*</sup> (OG)  | 2.73         |
| Arg <sup>116</sup> (O)   | Ser <sup>117*</sup> (OG)  | 3.70         |
| Arg <sup>116</sup> (O)   | Glu <sup>118*</sup> (N)   | 3.09         |
| Arg <sup>91</sup> (NH1)  | Glu <sup>77*</sup> (OE1)  | 3.68         |
| Arg <sup>91</sup> (NH2)  | Glu <sup>77*</sup> (OE2)  | 3.56         |
| Arg <sup>116</sup> (NE)  | Glu <sup>118*</sup> (OE1) | 3.73         |
| Arg <sup>116</sup> (NH1) | Asp <sup>122*</sup> (OD2) | 3.92         |
| Arg <sup>116</sup> (NH2) | Asp <sup>122*</sup> (OD1) | 3.55         |
| Glu <sup>77</sup> (OE1)  | Arg <sup>91*</sup> (NH1)  | 3.68         |
| Glu <sup>77</sup> (OE2)  | Arg <sup>91*</sup> (NH2)  | 3.56         |
| Glu <sup>118</sup> (OE1) | Arg <sup>116*</sup> (NE)  | 3.73         |
| Asp <sup>122</sup> (OD2) | Arg <sup>116*</sup> (NH1) | 3.92         |
| Asp <sup>122</sup> (OD1) | Arg <sup>116*</sup> (NH2) | 3.55         |
